# Supplementary material for: Polygenic risk scores for cluster of newly diagnosed type 2 diabetes: genetic insights and clinical implications
Source: Research Square preprint supplement (doi:10.21203/rs.3.rs-6268252/v1), 2025-03-26
Supplement: Supplementary file 1 [file 22b86dd279c1b1d0759de9b2.docx]

**Supplementary Fig. S1** Results of the genetic score test associated with diabetes in the Thai population. (A) ROC curve of PGS000804 in multiple logistic regression models: (black) PRS only, (blue) age + sex + BMI, and (red) age + sex + BMI + genetic score. AUC for black, red, and blue = 0.6245, 0.7819, and 0.8072, respectively. (B) Distribution of PGS000804 in T2D patients and control groups. (C) Odds ratio at different deciles of PGS000804 using Fisher’s exact test. Statistical significance is indicated by * (*p* < 0.05) and ** (*p* < 0.01).


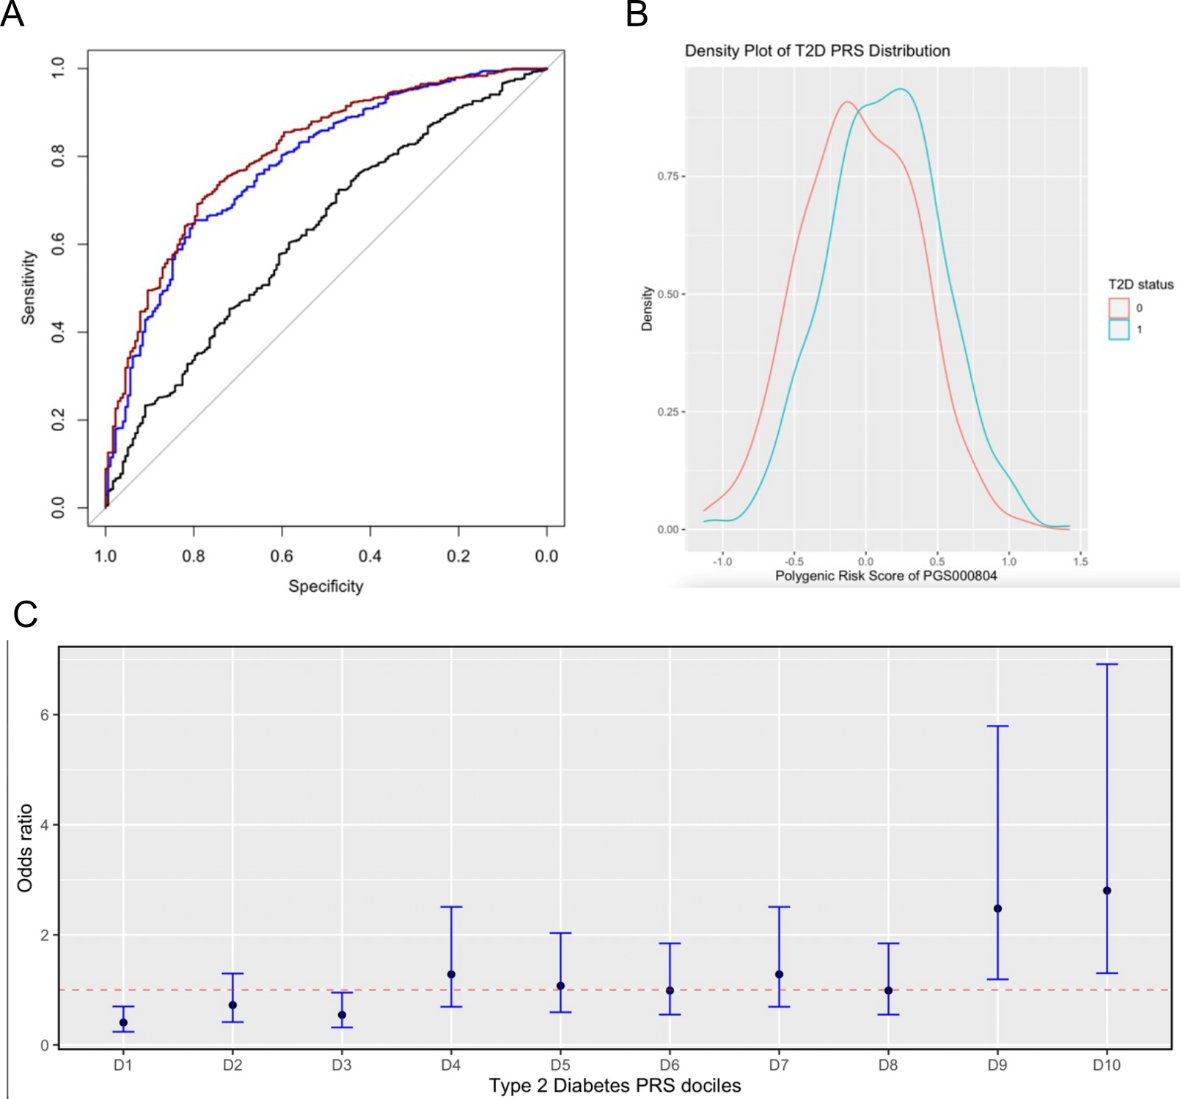


**Supplementary Fig. S2** Logistic regression analysis between allele counts at positions in PGS000804 and PGS003402 and type 2 diabetes (T2D). (A) Association tests between positions and T2D (red) and between positions and age at diagnosis (blue). (B) Comparison of beta-estimations between models for age at diagnosis and T2D. Blue indicates opposite directions, red indicates the same direction. Dark red circles represent positions with FDR < 0.05.


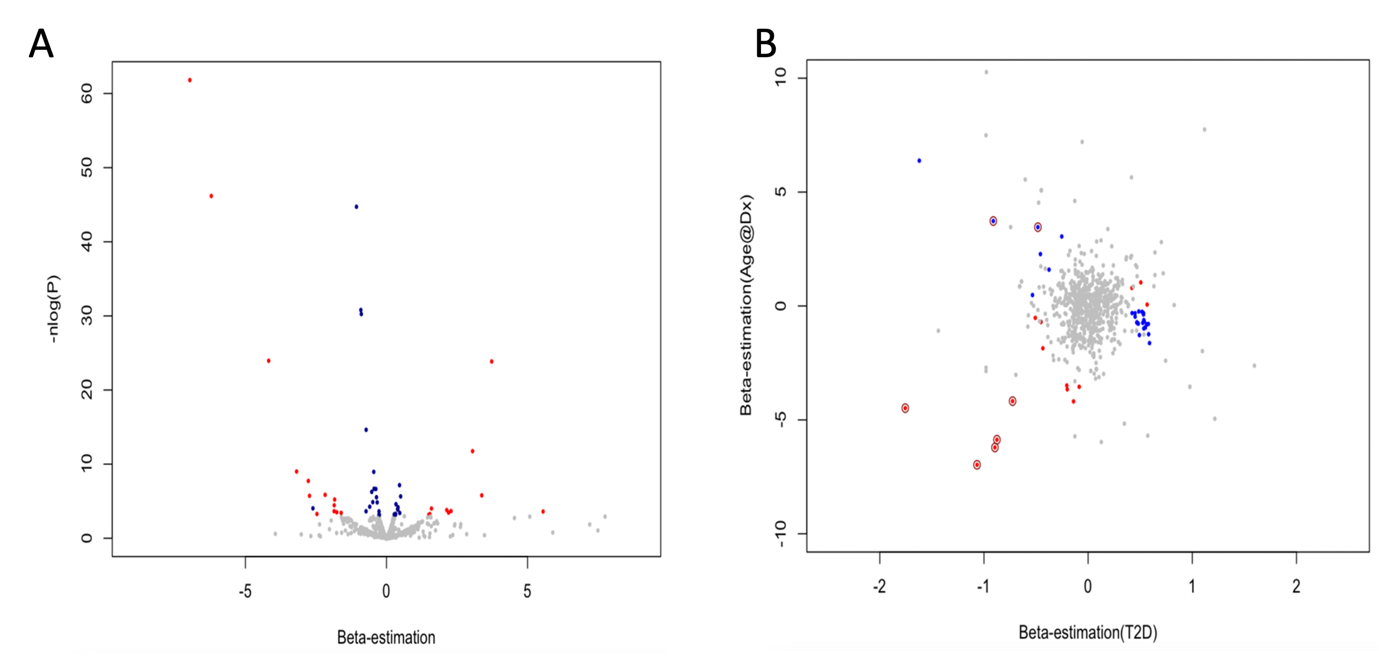


**Supplementary Table S1** Odds ratios and *p* values for different deciles of PGS000804 in the Thai population, comparing T2D cases and controls.

| **Docile** | **Case** | **Control** | ***p* value** | **Odds ratio** |
| --- | --- | --- | --- | --- |
| D1 | 41 | 30 | 0.001** | 0.41 (0.24,0.7) |
| D2 | 50 | 22 | 0.25 | 0.72 (0.42,1.3) |
| D3 | 46 | 26 | 0.03* | 0.55 (0.32,0.95) |
| D4 | 57 | 15 | 0.473 | 1.28 (0.69,2.51) |
| D5 | 55 | 17 | 0.886 | 1.07 (0.59,2.03) |
| D6 | 54 | 18 | 1 | 0.99 (0.55,1.84) |
| D7 | 57 | 15 | 0.473 | 1.28 (0.69,2.51) |
| D8 | 54 | 18 | 1 | 0.99 (0.55,1.84) |
| **D9** | **63** | **9** | **0.009*** | **2.48 (1.19,5.79)** |
| **D10** | **63** | **8** | **0.005*** | **2.8 (1.3,6.92)** |

**Supplementary Table S2** SNP and risk allele associated with type 2 diabetes and age at diagnosis

| **SNP** | **Direction** | | **Risk allele for T2D** | **Risk allele for AaD** |
| --- | --- | --- | --- | --- |
| **T2D** | **AaD** |
| **rs2216063(G/A)** | **-** | **++** | **G** | **G** |
| **rs9358356(T/C)** | **-** | **+** | **T** | **T** |
| **rs9472138(C/T)** | **--** | **+++** | **C** | **C** |
| rs6479591(G/A) | - | -- | G | A |
| rs10818763(C/T) | - | -- | C | T |
| rs189339(A/G) | - | -- | A | G |
| rs4382480(G/A) | -- | - | G | A |
| rs3132469(A/G) | --- | -- | A | G |

**Abbreviations** AaD, age at diagnosis; T2D, type 2 diabetes

**Supplementary Table S3** Frequency of homozygous GTC at rs2216063, rs9358356, and rs9472138 in type 2 diabetes patients across different clusters

| **Cluster** | **G-T-C: 194** | **Others: 277** | **G-T-C Freq** | **χ2** | ***p* value** |
| --- | --- | --- | --- | --- | --- |
| MARD | 24 | 187 | 0.11 | 125.92 | <0.001 |
| MOD | 78 | 40 | 0.66 | 12.237 | 0.0004684 |
| MSD | 3 | 50 | 0.06 | 41.679 | <0.001 |
| SIDD | 89 | 0 | 1.00 | 89 | <0.001 |

**Abbreviations** MARD, mild age-related diabetes; MOD, mild obesity-related diabetes; MSD, metabolic syndrome diabetes; SIDD, severe insulin-deficient diabetes
